# Supplementary material for: Carbon catabolite repression correlates with the maintenance of near invariant molecular crowding in proliferating E. coli cells
Source: Springer Nature journal article supplement (doi:10.1186/1752-0509-7-138), 2013-12-01

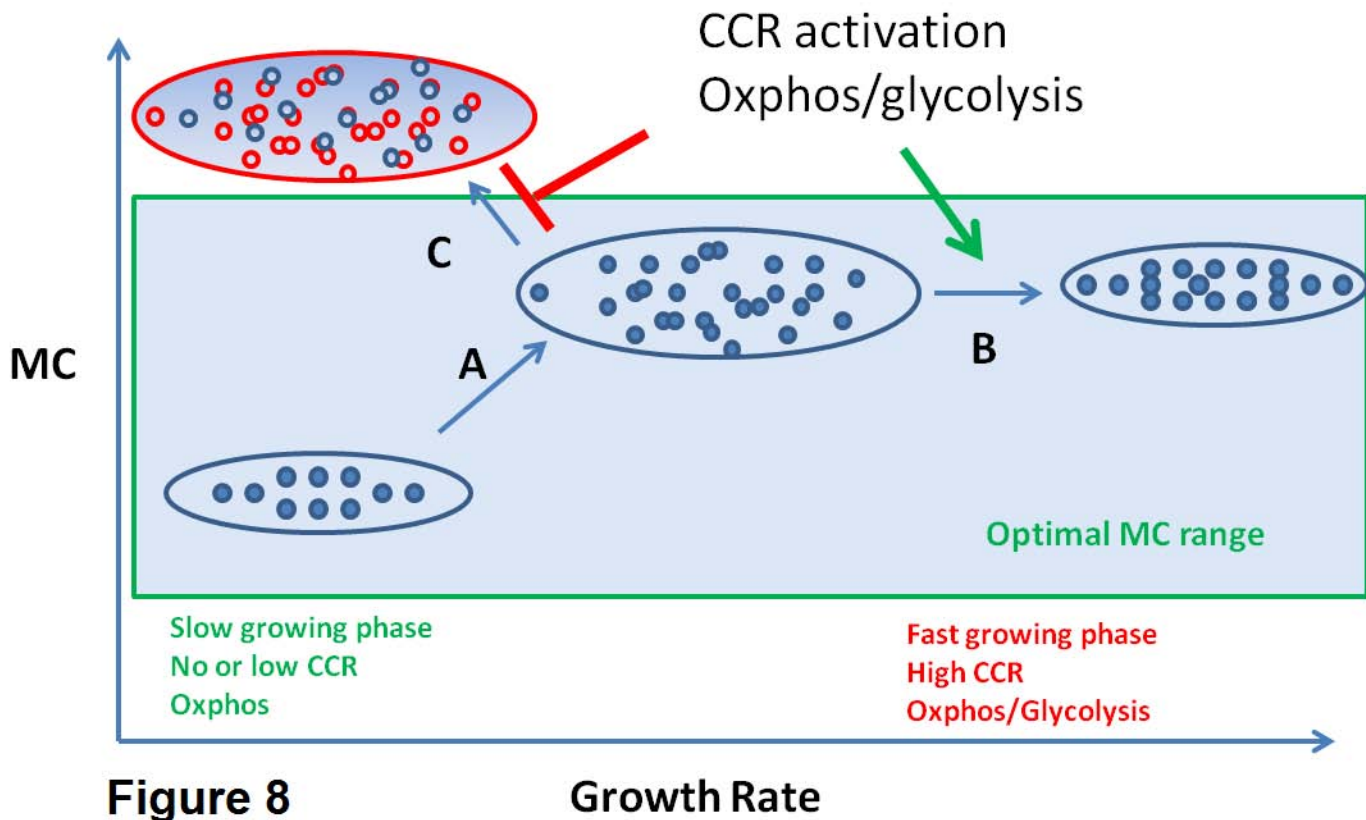

Supplement: 12918_2013_1242_MOESM13_ESM.pdf [file 12918_2013_1242_MOESM13_ESM.pdf]
